# Supplementary material
Source: publisher site journal article supplement (https://www.dovepress.com/article/277724)
Supplement: Supplementary file 1 [file get_supplementary_file.php]

## Supplementary Material

Includes 3 tables and 1 figure.

**Table S1.** All germline variants in the HGSOC patients.

| Position | Sequence changes | Locus      | Amino acid change | Functional class | Status     | GB Freq. | MitoTIP Score | Polyphen2 Score | Score Interpretation | Counts | Case#                                                                                                       | Observed in cell or tissue type (MITOMAP)                                                                                    |
|----------|------------------|------------|-------------------|------------------|------------|----------|---------------|-----------------|----------------------|--------|-------------------------------------------------------------------------------------------------------------|------------------------------------------------------------------------------------------------------------------------------|
| 73       | A > G            | MT-HV2     |                   |                  | Homoplasmy | 76466    |               |                 |                      | 16     | soc1, soc5, soc7, soc10, soc11, soc12, soc14, soc15, soc16, soc17, soc18, soc19, soc20, soc21, soc23, soc24 | aging brains, POLG/PEO & control muscle, buccal cell, thyroid & prostate tumors                                              |
| 114      | C > T            | MT-HV2/OHR |                   |                  | Homoplasmy | 332      |               |                 |                      | 1      | soc20                                                                                                       | POLG/PEO muscle, bladder tumor back-mutation, BD-associated                                                                  |
| 146      | T > C            | MT-HV2/OHR |                   |                  | Homoplasmy | 18543    |               |                 |                      | 2      | soc15, soc23                                                                                                | ovarian carcinoma                                                                                                            |
| 150      | C > T            | MT-HV2/OHR |                   |                  | Homoplasmy | 13908    |               |                 |                      | 4      | soc1, soc7, soc19, soc20                                                                                    | elderly fibroblasts/leukocytes, lung, thyroid, prostate tumors                                                               |
| 151      | C > T            | MT-HV2/OHR |                   |                  | Homoplasmy | 3343     |               |                 |                      | 1      | soc24                                                                                                       |                                                                                                                              |
| 152      | T > C            | MT-HV2/OHR |                   |                  | Homoplasmy | 26471    |               |                 |                      | 6      | soc7, soc12, soc14, soc17, soc18, soc24                                                                     | elderly brains, elderly fibroblasts, ovarian carcinoma, breast tumor                                                         |
| 183      | A > G            | MT-HV2/OHR |                   |                  | Homoplasmy | 705      |               |                 |                      | 1      | soc11                                                                                                       | POLG/PEO muscle                                                                                                              |
| 195      | T > C            | MT-HV2/OHR |                   |                  | Homoplasmy | 18627    |               |                 |                      | 2      | soc20, soc14                                                                                                | elderly fibroblasts, elderly/AD brains, tumors: lung, thyroid, ovarian, prostate, glioblastoma, BD-associated / melanoma pts |
| 207      | G > A            | MT-HV2/OHR |                   |                  | Homoplasmy | 4269     |               |                 |                      | 2      | soc15, soc17                                                                                                | oral, prostate & thyroid tumors                                                                                              |
| 214      | A > G            | MT-HV2/OHR |                   |                  | Homoplasmy | 426      |               |                 |                      | 2      | soc10, soc18                                                                                                |                                                                                                                              |
| 228      | G > A            | MT-HV2/OHR |                   |                  | Homoplasmy | 1933     |               |                 |                      | 1      | soc12                                                                                                       |                                                                                                                              |

|            |                                      |                      |  |  |                                             |       |  |  |  |    |                                                                                                             |                                                                                 |
|------------|--------------------------------------|----------------------|--|--|---------------------------------------------|-------|--|--|--|----|-------------------------------------------------------------------------------------------------------------|---------------------------------------------------------------------------------|
| 235        | A > G                                | MT-HV2/OHR/C SB1/TFX |  |  | Homoplasmy                                  | 3915  |  |  |  | 2  | soc14, soc17                                                                                                | prostate tumor                                                                  |
| 248        | delA                                 | MT-HV2               |  |  | Homoplasmy                                  | 6843  |  |  |  | 3  | soc16, soc18, soc21                                                                                         |                                                                                 |
| 263        | A > G                                | MT-HV2/OHR           |  |  | Homoplasmy                                  | 89941 |  |  |  | 15 | soc1, soc5, soc7, soc10, soc11, soc12, soc14, soc15, soc16, soc18, soc19, soc20, soc21, soc23, soc24        | POLG/MNGIE muscle                                                               |
| 272        | A > G                                | MT-HV2/OHR           |  |  | Homoplasmy                                  | 81    |  |  |  | 1  | soc24                                                                                                       |                                                                                 |
| 310C-tract | Multiple changes, includes np303-315 | upstream             |  |  | Homoplasmy:Het eroplasmy, 4:12              | -     |  |  |  | 16 | soc1, soc5, soc7, soc10, soc11, soc12, soc14, soc15, soc16, soc17, soc18, soc19, soc20, soc21, soc23, soc24 | MSS                                                                             |
| 316        | G > A                                | MT-HV2/OHR           |  |  | Homoplasmy                                  | 1390  |  |  |  | 1  | soc12                                                                                                       |                                                                                 |
| 368        | A > G                                | MT-HV2/OHR           |  |  | Homoplasmy                                  | 72    |  |  |  | 1  | soc10                                                                                                       | elderly fibroblasts                                                             |
| 408        | T > A                                | MT-OHR/LSP           |  |  | Homoplasmy                                  | 187   |  |  |  | 1  | soc15                                                                                                       | elderly muscle, POLG/PEO, Twinkle/PEO frontal cortex and muscle, normal tissues |
| 439        | A > C                                | MT-OHR/LSP/TF L/HV3  |  |  | Heteroplasmy, loss in ovarian cancer tissue | 10    |  |  |  | 2  | soc10, soc14                                                                                                |                                                                                 |
| 456        | C > T                                | MT-HV3               |  |  | Homoplasmy                                  | 1936  |  |  |  | 1  | soc7                                                                                                        | thyroid tumor                                                                   |
| 471        | T > C                                | MT-HV3               |  |  | Homoplasmy                                  | 131   |  |  |  | 1  | soc18                                                                                                       |                                                                                 |
| 489        | T > C                                | MT-HV3               |  |  | Homoplasmy                                  | 23766 |  |  |  | 6  | soc5, soc7, soc18, soc19, soc21, soc24                                                                      | ovarian carcinoma, prostate tumor                                               |
| 499        | G > A                                | MT-HV3               |  |  | Homoplasmy                                  | 3296  |  |  |  | 1  | soc15                                                                                                       | thyroid & prostate tumors                                                       |
| np514-523  | Simple sequence repeats, delCA       | upstream             |  |  | Homoplasmy                                  | -     |  |  |  | 5  | soc5, soc11, soc 14, soc17, soc19                                                                           | MSS                                                                             |
| 663        | A > G                                | MT-RNR1              |  |  | Homoplasmy                                  | 1404  |  |  |  | 2  | soc14, soc17                                                                                                | Coronary Atherosclerosis risk                                                   |
| 681        | T > C                                | MT-RNR1              |  |  | Homoplasmy                                  | 148   |  |  |  | 1  | soc7                                                                                                        |                                                                                 |
| 709        | G > A                                | MT-RNR1              |  |  | Homoplasmy                                  | 6635  |  |  |  | 3  | soc10, soc18, soc23                                                                                         |                                                                                 |

|      |          |              |        |                |            |       |  |       |        |    |                                                                                                             |                                        |
|------|----------|--------------|--------|----------------|------------|-------|--|-------|--------|----|-------------------------------------------------------------------------------------------------------------|----------------------------------------|
| 750  | A > G    | MT-RNR1      |        |                | Homoplasmy | 50304 |  |       |        | 16 | soc1, soc5, soc7, soc10, soc11, soc12, soc14, soc15, soc16, soc17, soc18, soc19, soc20, soc21, soc23, soc24 | SZ-associated                          |
| 752  | C > T    | MT-RNR1      |        |                | Homoplasmy | 216   |  |       |        | 1  | soc19                                                                                                       |                                        |
| 827  | A > G    | MT-RNR1      |        |                | Homoplasmy | 1291  |  |       |        | 2  | soc12, soc15                                                                                                | DEAF                                   |
| 1005 | T > C    | MT-RNR1      |        |                | Homoplasmy | 230   |  |       |        | 1  | soc16                                                                                                       | DEAF                                   |
| 1048 | C > T    | MT-RNR1      |        |                | Homoplasmy | 1896  |  |       |        | 1  | soc7                                                                                                        |                                        |
| 1107 | T > C    | MT-RNR1      |        |                | Homoplasmy | 385   |  |       |        | 2  | soc7, soc19                                                                                                 |                                        |
| 1119 | T > C    | MT-RNR1      |        |                | Homoplasmy | 288   |  |       |        | 2  | soc10, soc20                                                                                                |                                        |
| 1438 | A > G    | MT-RNR1      |        |                | Homoplasmy | 48542 |  |       |        | 15 | soc1, soc5, soc7, soc10, soc11, soc12, soc14, soc15, soc16, soc17, soc18, soc20, soc21, soc23, soc24        | DM/SZ-associated                       |
| 1541 | T > C    | MT-RNR1      |        |                | Homoplasmy | 138   |  |       |        | 1  | soc11                                                                                                       |                                        |
| 1719 | G > A    | MT-RNR2      |        |                | Homoplasmy | 2435  |  |       |        | 1  | soc17                                                                                                       |                                        |
| 1736 | A > G    | MT-RNR2      |        |                | Homoplasmy | 1389  |  |       |        | 2  | soc14, soc17                                                                                                |                                        |
| 1824 | T > C    | MT-RNR2      |        |                | Homoplasmy | 172   |  |       |        | 1  | soc16                                                                                                       |                                        |
| 2483 | T > C    | MT-RNR2      |        |                | Homoplasmy | 94    |  |       |        | 1  | soc5                                                                                                        |                                        |
| 2626 | T > C    | MT-RNR2      |        |                | Homoplasmy | 222   |  |       |        | 1  | soc5                                                                                                        |                                        |
| 2706 | A > G    | MT-RNR2      |        |                | Homoplasmy | 40409 |  |       |        | 3  | soc14, soc19, soc20                                                                                         |                                        |
| 2772 | C > T    | MT-RNR2      |        |                | Homoplasmy | 175   |  |       |        | 1  | soc5                                                                                                        |                                        |
| 3010 | G > A    | MT-RNR2      |        |                | Homoplasmy | 7351  |  |       |        | 1  | soc24                                                                                                       | Cyclic Vomiting Syndrome with Migraine |
| 3105 | 3106delC | MT-RNR2      |        |                | Homoplasmy | 2     |  |       |        | 16 | soc1, soc5, soc7, soc10, soc11, soc12, sic14, soc15, soc16, soc17, soc18, soc19, soc20, soc21, soc23, soc24 |                                        |
| 3206 | C > T    | MT-RNR2/RNR3 |        |                | Homoplasmy | 158   |  |       |        | 1  | soc24                                                                                                       |                                        |
| 3402 | A > G    | MT-ND1       | p.Q32Q | synonymous SNV | Homoplasmy | 5     |  |       |        | 1  | soc19                                                                                                       |                                        |
| 3497 | C > T    | MT-ND1       | p.A64V | MISSENSE       | Homoplasmy | 185   |  | 0.009 | benign | 2  | soc10, soc20                                                                                                | LHON                                   |

|      |       |        |         |                |              |       |        |       |               |    |                                                                                                             |                                         |
|------|-------|--------|---------|----------------|--------------|-------|--------|-------|---------------|----|-------------------------------------------------------------------------------------------------------------|-----------------------------------------|
| 3552 | T > A | MT-ND1 | p.A82A  | synonymous SNV | Homoplasmy   | 1779  |        |       |               | 1  | soc21                                                                                                       |                                         |
| 3756 | A > G | MT-ND1 | p.L150L | synonymous SNV | Homoplasmy   | 760   |        |       |               | 1  | soc5                                                                                                        |                                         |
| 3834 | G > A | MT-ND1 | p.L176L | synonymous SNV | Homoplasmy   | 448   |        |       |               | 1  | soc23                                                                                                       |                                         |
| 3918 | G > A | MT-ND1 | p.E204E | synonymous SNV | Homoplasmy   | 452   |        |       |               | 1  | soc10                                                                                                       | breast tumor                            |
| 3970 | C > T | MT-ND1 | p.L222L | synonymous SNV | Homoplasmy   | 1898  |        |       |               | 2  | soc11, soc16                                                                                                |                                         |
| 4227 | A > G | MT-ND1 | p.M307M | synonymous SNV | Homoplasmy   | 58    |        |       |               | 1  | soc12                                                                                                       |                                         |
| 4248 | T > C | MT-ND1 | p.I314I | synonymous SNV | Homoplasmy   | 1787  |        |       |               | 2  | soc14, soc17                                                                                                |                                         |
| 4386 | T > C | MT-TQ  |         |                | Homoplasmy   | 168   | 3.0739 |       | likely benign | 2  | soc1, soc5                                                                                                  | Heart disease / myopathy / hypertension |
| 4502 | T > C | MT-ND2 | p.S11S  | synonymous SNV | Homoplasmy   | 69    |        |       |               | 1  | soc18                                                                                                       |                                         |
| 4715 | A > G | MT-ND2 | p.G82G  | synonymous SNV | Homoplasmy   | 2218  |        |       |               | 2  | soc18, soc21                                                                                                |                                         |
| 4769 | A > G | MT-ND2 | p.M100M | synonymous SNV | Homoplasmy   | 49949 |        |       |               | 16 | soc1, soc5, soc7, soc10, soc11, soc12, soc14, soc15, soc16, soc17, soc18, soc19, soc20, soc21, soc23, soc24 | SZ-associated                           |
| 4820 | G > A | MT-ND2 | p.E117E | synonymous SNV | Homoplasmy   | 1219  |        |       |               | 1  | soc15                                                                                                       |                                         |
| 4824 | A > G | MT-ND2 | p.T119A | MISSENSE       | Homoplasmy   | 1449  |        | 0.318 | benign        | 2  | soc14, soc17                                                                                                |                                         |
| 4853 | G > A | MT-ND2 | p.L128L | synonymous SNV | Homoplasmy   | 141   |        |       |               | 1  | soc18                                                                                                       |                                         |
| 4883 | C > T | MT-ND2 | p.P138P | synonymous SNV | Homoplasmy   | 2398  |        |       |               | 3  | soc7, soc19, soc24                                                                                          | Glaucoma                                |
| 4884 | A > C | MT-ND2 | p.I139L | MISSENSE       | Homoplasmy   | 2     |        | 0.001 | benign        | 1  | soc11                                                                                                       |                                         |
| 4924 | G > A | MT-ND2 | p.S152N | MISSENSE       | Homoplasmy   | 69    |        | 0.003 | benign        | 1  |                                                                                                             |                                         |
| 4958 | A > G | MT-ND2 | p.M163M | synonymous SNV | Homoplasmy   | 140   |        |       |               | 1  | soc5                                                                                                        |                                         |
| 5048 | T > C | MT-ND2 | p.V193V | synonymous SNV | Heteroplasmy | 158   |        |       |               | 1  | soc5 (loss in ovarian cancer tissue)                                                                        |                                         |

|      |       |          |         |                |            |       |        |       |                   |    |                                                                                                             |                                                                    |
|------|-------|----------|---------|----------------|------------|-------|--------|-------|-------------------|----|-------------------------------------------------------------------------------------------------------------|--------------------------------------------------------------------|
| 5147 | G > A | MT-ND2   | p.T226T | synonymous SNV | Homoplasmy | 2208  |        |       |                   | 1  | soc12                                                                                                       |                                                                    |
| 5153 | A > G | MT-ND2   | p.L228L | synonymous SNV | Homoplasmy | 341   |        |       |                   | 1  | soc7                                                                                                        |                                                                    |
| 5178 | C > A | MT-ND2   | p.L237M | MISSENSE       | Homoplasmy | 2375  |        | 0.92  | probably damaging | 3  | soc7, soc19, soc24                                                                                          | Longevity; Extraversion MI / AMS protection; blood iron metabolism |
| 5196 | T > C | MT-ND2   | p.L243L | synonymous SNV | Homoplasmy | 101   |        |       |                   | 1  | soc20                                                                                                       |                                                                    |
| 5231 | G > A | MT-ND2   | p.L254L | synonymous SNV | Homoplasmy | 1169  |        |       |                   | 1  | soc1                                                                                                        | endometrium control tissue, Normal in paired tumor tissue          |
| 5301 | A > G | MT-ND2   | p.I278V | MISSENSE       | Homoplasmy | 447   |        | 0.005 | benign            | 2  | soc7, soc19                                                                                                 |                                                                    |
| 5417 | G > A | MT-ND2   | p.Q316Q | synonymous SNV | Homoplasmy | 552   |        |       |                   | 2  | soc1, soc23                                                                                                 |                                                                    |
| 5441 | A > G | MT-ND2   | p.P324P | synonymous SNV | Homoplasmy | 29    |        |       |                   | 1  | soc20                                                                                                       |                                                                    |
| 5466 | A > G | MT-ND2   | p.T333A | MISSENSE       | Homoplasmy | 24    |        | 0.009 | benign            | 1  | soc24                                                                                                       |                                                                    |
| 5821 | G > A | MT-TC    |         |                | Homoplasmy | 342   | 7.6717 |       | likely benign     | 1  | soc18                                                                                                       | DEAF helper mut.                                                   |
| 5895 | delC  | upstream |         |                | Homoplasmy | 15    |        |       |                   | 1  | soc5                                                                                                        | MSS                                                                |
| 6023 | G > A | MT-CO1   | p.E40E  | synonymous SNV | Homoplasmy | 403   |        |       |                   | 1  | soc15                                                                                                       |                                                                    |
| 6253 | T > C | MT-CO1   | p.M117T | MISSENSE       | Homoplasmy | 531   |        | 0     | benign            | 1  | soc7                                                                                                        | Prostate Cancer / enriched in POAG cohort                          |
| 6340 | C > T | MT-CO1   | p.T146I | MISSENSE       | Homoplasmy | 88    |        | 0.025 | benign            | 1  | soc14                                                                                                       | Prostate Cancer                                                    |
| 6392 | T > C | MT-CO1   | p.N163N | synonymous SNV | Homoplasmy | 1853  |        |       |                   | 1  | soc16                                                                                                       |                                                                    |
| 6413 | T > C | MT-CO1   | p.N170N | synonymous SNV | Homoplasmy | 316   |        |       |                   | 1  | soc15                                                                                                       |                                                                    |
| 6455 | C > T | MT-CO1   | p.F184F | synonymous SNV | Homoplasmy | 1582  |        |       |                   | 1  | soc5                                                                                                        |                                                                    |
| 6752 | A > G | MT-CO1   | p.L283L | synonymous SNV | Homoplasmy | 341   |        |       |                   | 1  | soc18                                                                                                       |                                                                    |
| 7028 | C > T | MT-CO1   | p.A375A | synonymous SNV | Homoplasmy | 41344 |        |       |                   | 16 | soc1, soc5, soc7, soc10, soc11, soc12, soc14, soc15, soc16, soc17, soc18, soc19, soc20, soc21, soc23, soc24 |                                                                    |
| 7196 | C > A | MT-CO1   | p.L431L | synonymous SNV | Homoplasmy | 2072  |        |       |                   | 2  | soc18, soc21                                                                                                |                                                                    |

|      |                           |          |         |                |            |       |  |       |                   |    |                                                                                                             |                                                       |
|------|---------------------------|----------|---------|----------------|------------|-------|--|-------|-------------------|----|-------------------------------------------------------------------------------------------------------------|-------------------------------------------------------|
| 7220 | T > C                     | MT-CO1   | p.R439R | synonymous SNV | Homoplasmy | 33    |  |       |                   | 1  | soc17                                                                                                       |                                                       |
| 7270 | T > C                     | MT-CO1   | p.V456A | MISSENSE       | Homoplasmy | 83    |  | 0.116 | benign            | 1  | soc7                                                                                                        |                                                       |
| 7828 | A > G                     | MT-CO2   | p.L81L  | synonymous SNV | Homoplasmy | 316   |  |       |                   | 1  | soc16                                                                                                       |                                                       |
| 7830 | G > A                     | MT-CO2   | p.R82H  | MISSENSE       | Homoplasmy | 55    |  | 0.986 | probably damaging | 1  | soc1                                                                                                        |                                                       |
| 8188 | A > G                     | MT-CO2   | p.G201G | synonymous SNV | Homoplasmy | 342   |  |       |                   | 1  | soc21                                                                                                       |                                                       |
| 8270 | 8271_8279delA<br>CCCCCTCT | upstream |         |                | Homoplasmy | 162   |  |       |                   | 2  | soc10, soc12                                                                                                |                                                       |
| 8392 | G > A                     | MT-ATP8  | p.W9W   | synonymous SNV | Homoplasmy | 359   |  |       |                   | 1  | soc23                                                                                                       |                                                       |
| 8414 | C > T                     | MT-ATP8  | p.L17F  | MISSENSE       | Homoplasmy | 1968  |  | 0.992 | probably damaging | 1  | soc24                                                                                                       | Longevity (protective factor)                         |
| 8459 | A > G                     | MT-ATP8  | p.N32D  | MISSENSE       | Homoplasmy | 113   |  | 0.974 | probably damaging | 1  | soc17                                                                                                       |                                                       |
| 8473 | T > C                     | MT-ATP8  | p.P36P  | synonymous SNV | Homoplasmy | 538   |  |       |                   | 2  | soc15, soc24                                                                                                |                                                       |
| 8584 | G > A                     | MT-ATP6  | p.A20T  | MISSENSE       | Homoplasmy | 2834  |  | 0.012 | benign            | 2  | soc18, soc21                                                                                                |                                                       |
| 8679 | A > G                     | MT-ATP6  | p.K51K  | synonymous SNV | Homoplasmy | 52    |  |       |                   | 1  | soc16                                                                                                       |                                                       |
| 8701 | A > G                     | MT-ATP6  | p.T59A  | MISSENSE       | Homoplasmy | 17050 |  | 0.005 | benign            | 6  | soc5, soc7, soc18, soc19, soc21, soc24                                                                      | thyroid tumors                                        |
| 8794 | C > T                     | MT-ATP6  | p.H90Y  | MISSENSE       | Homoplasmy | 1399  |  | 0.003 | benign            | 2  | soc14, soc17                                                                                                | Exercise Endurance /<br>Coronary Atherosclerosis risk |
| 8860 | A > G                     | MT-ATP6  | p.T112A | MISSENSE       | Homoplasmy | 50409 |  | 0.003 | benign            | 16 | soc1, soc5, soc7, soc10, soc11, soc12, soc14, soc15, soc16, soc17, soc18, soc19, soc20, soc21, soc23, soc24 |                                                       |
| 9055 | G > A                     | MT-ATP6  | p.A177T | MISSENSE       | Homoplasmy | 2178  |  | 0.399 | benign            | 1  | soc15                                                                                                       | PD (protective factor)                                |
| 9077 | T > C                     | MT-ATP6  | p.I184T | MISSENSE       | Homoplasmy | 74    |  | 0.003 | benign            | 1  | soc21                                                                                                       |                                                       |
| 9090 | T > C                     | MT-ATP6  | p.S188S | synonymous SNV | Homoplasmy | 206   |  |       |                   | 1  | soc18                                                                                                       |                                                       |
| 9180 | A > G                     | MT-ATP6  | p.V218V | synonymous SNV | Homoplasmy | 477   |  |       |                   | 2  | soc7, soc19                                                                                                 |                                                       |
| 9182 | G > A                     | MT-ATP6  | p.S219N | MISSENSE       | Homoplasmy | 48    |  | 0.978 | probably damaging | 1  | soc5                                                                                                        |                                                       |
| 9233 | T > C                     | MT-CO3   | p.H9H   | synonymous SNV | Homoplasmy | 68    |  |       |                   | 1  | soc5                                                                                                        |                                                       |

|       |       |         |         |                |            |       |  |       |        |   |                                                      |                                                                                              |
|-------|-------|---------|---------|----------------|------------|-------|--|-------|--------|---|------------------------------------------------------|----------------------------------------------------------------------------------------------|
| 9338  | A > T | MT-CO3  | p.M44I  | MISSENSE       | Homoplasmy | 26    |  | 0.001 | benign | 1 | soc15                                                |                                                                                              |
| 9540  | T > C | MT-CO3  | p.L112L | synonymous SNV | Homoplasmy | 17044 |  |       |        | 6 | soc5, soc7, soc18, soc19, soc21, soc24               | tumor                                                                                        |
| 9545  | A > G | MT-CO3  | p.G113G | synonymous SNV | Homoplasmy | 2417  |  |       |        | 1 | soc21                                                |                                                                                              |
| 9615  | T > C | MT-CO3  | p.L137L | synonymous SNV | Homoplasmy | 96    |  |       |        | 1 | soc15                                                |                                                                                              |
| 9716  | T > A | MT-CO3  | p.G170G | synonymous SNV | Homoplasmy | 6     |  |       |        | 1 | soc14                                                |                                                                                              |
| 9824  | T > C | MT-CO3  | p.L206L | synonymous SNV | Homoplasmy | 1464  |  |       |        | 1 | soc5                                                 |                                                                                              |
| 10208 | T > C | MT-ND3  | p.P50P  | synonymous SNV | Homoplasmy | 83    |  |       |        | 1 | soc18                                                |                                                                                              |
| 10310 | G > A | MT-ND3  | p.L84L  | synonymous SNV | Homoplasmy | 1844  |  |       |        | 2 | soc10, soc16                                         |                                                                                              |
| 10379 | A > G | MT-ND3  | p.L107L | synonymous SNV | Homoplasmy | 5     |  |       |        | 1 | soc23                                                |                                                                                              |
| 10397 | A > G | MT-ND3  | p.W113W | synonymous SNV | Homoplasmy | 427   |  |       |        | 2 | soc7, soc19                                          |                                                                                              |
| 10398 | A > G | MT-ND3  | p.T114A | MISSENSE       | Homoplasmy | 22565 |  | 0     | benign | 8 | soc5, soc7, soc18, soc19, soc20, soc21, soc23, soc24 | PD protective factor / longevity / altered cell pH / metabolic syndrome / breast cancer risk |
| 10400 | C > T | MT-ND3  | p.T114T | synonymous SNV | Homoplasmy | 10840 |  |       |        | 6 | soc5, soc7, soc18, soc19, soc21, soc24               |                                                                                              |
| 10535 | T > C | MT-ND4L | p.Y22Y  | synonymous SNV | Homoplasmy | 188   |  |       |        | 1 | soc16                                                |                                                                                              |
| 10586 | G > A | MT-ND4L | p.S39S  | synonymous SNV | Homoplasmy | 870   |  |       |        | 1 | soc16                                                |                                                                                              |
| 10736 | C > T | MT-ND4L | p.Y89Y  | synonymous SNV | Homoplasmy | 28    |  |       |        | 1 | soc11                                                |                                                                                              |
| 10757 | C > G | MT-ND4L | p.L96L  | synonymous SNV | Homoplasmy | 2     |  |       |        | 1 | soc12                                                |                                                                                              |
| 10790 | T > C | MT-ND4  | p.L11L  | synonymous SNV | Homoplasmy | 140   |  |       |        | 1 | soc10                                                |                                                                                              |
| 10810 | T > C | MT-ND4  | p.L17L  | synonymous SNV | Homoplasmy | 2688  |  |       |        | 1 | soc16                                                |                                                                                              |
| 10873 | T > C | MT-ND4  | p.P38P  | synonymous SNV | Homoplasmy | 17033 |  |       |        | 6 | soc5, soc7, soc18, soc19, soc21, soc24               |                                                                                              |

|       |       |        |         |                |            |       |        |         |                   |    |                                                                                                             |                                                  |
|-------|-------|--------|---------|----------------|------------|-------|--------|---------|-------------------|----|-------------------------------------------------------------------------------------------------------------|--------------------------------------------------|
| 11017 | T > C | MT-ND4 | p.S86S  | synonymous SNV | Homoplasmy | 136   |        |         |                   | 1  | soc5                                                                                                        |                                                  |
| 11077 | A > G | MT-ND4 | p.L106L | synonymous SNV | Homoplasmy | 7     |        |         |                   | 1  | soc11                                                                                                       |                                                  |
| 11084 | A > G | MT-ND4 | p.T109A | MISSENSE       | Homoplasmy | 204   |        | 0.988   | probably damaging | 2  | soc5, soc17                                                                                                 | AD, PD; MELAS                                    |
| 11152 | T > C | MT-ND4 | p.A131A | synonymous SNV | Homoplasmy | 120   |        |         |                   | 1  | soc19                                                                                                       | pancreatic cancer cell line                      |
| 11377 | G > A | MT-ND4 | p.K206K | synonymous SNV | Homoplasmy | 644   |        |         |                   | 1  | soc10                                                                                                       |                                                  |
| 11428 | C > A | MT-ND4 | p.A223A | synonymous SNV | Homoplasmy | 3     |        |         |                   | 1  | soc12                                                                                                       |                                                  |
| 11719 | G > A | MT-ND4 | p.G320G | synonymous SNV | Homoplasmy | 39624 |        |         |                   | 16 | soc1, soc5, soc7, soc10, soc11, soc12, soc14, soc15, soc16, soc17, soc18, soc19, soc20, soc21, soc23, soc24 |                                                  |
| 11809 | T > C | MT-ND4 | p.T350T | synonymous SNV | Homoplasmy | 75    |        |         |                   | 1  | soc14                                                                                                       |                                                  |
| 11914 | G > A | MT-ND4 | p.T385T | synonymous SNV | Homoplasmy | 5754  |        |         |                   | 2  | soc12, soc21                                                                                                |                                                  |
| 11944 | T > C | MT-ND4 | p.L395L | synonymous SNV | Homoplasmy | 1606  |        |         |                   | 1  | soc19                                                                                                       |                                                  |
| 11974 | A > G | MT-ND4 | p.L405L | synonymous SNV | Homoplasmy | 61    |        |         |                   | 1  | soc17                                                                                                       | pancreatic cancer cell line                      |
| 12007 | G > A | MT-ND4 | p.W416W | synonymous SNV | Homoplasmy | 3313  |        |         |                   | 1  | soc1                                                                                                        |                                                  |
| 12026 | A > G | MT-ND4 | p.I423V | MISSENSE       | Homoplasmy | 246   |        | 0.01    | benign            | 1  | soc19                                                                                                       | DM                                               |
| 12172 | A > G | MT-TH  |         |                | Homoplasmy | 343   | 3.3266 |         | likely benign     | 1  | soc11                                                                                                       |                                                  |
| 12192 | G > A | MT-TH  |         |                | Homoplasmy | 112   | 2.6593 |         | likely benign     | 1  | soc19                                                                                                       | MICM                                             |
| 12248 | A > G | MT-TS2 |         |                | Homoplasmy | 105   | 3.692  |         | likely benign     | 1  | soc10                                                                                                       |                                                  |
| 12338 | T > C | MT-ND5 | p.M1T   | MISSENSE       | Homoplasmy | 174   |        | Unknown | Unknown           | 1  | soc16                                                                                                       | DEAF1555 increased penetrance / LHON             |
| 12358 | A > G | MT-ND5 | p.T8A   | MISSENSE       | Homoplasmy | 775   |        | Unknown | Unknown           | 1  | soc1                                                                                                        |                                                  |
| 12361 | A > G | MT-ND5 | p.T9A   | MISSENSE       | Homoplasmy | 277   |        | Unknown | Unknown           | 1  | soc10                                                                                                       | Nonalcoholic fatty liver disease                 |
| 12372 | G > A | MT-ND5 | p.L12L  | synonymous SNV | Homoplasmy | 6929  |        |         |                   | 1  | soc1                                                                                                        | prostate tumor, Altered brain pH / sCJD patients |
| 12406 | G > A | MT-ND5 | p.V24I  | MISSENSE       | Homoplasmy | 1380  |        | 0.001   | benign            | 1  | soc10                                                                                                       |                                                  |



|       |       |        |         |                |              |       |  |       |                   |    |                                                                   |                                                                                                                                                                                              |
|-------|-------|--------|---------|----------------|--------------|-------|--|-------|-------------------|----|-------------------------------------------------------------------|----------------------------------------------------------------------------------------------------------------------------------------------------------------------------------------------|
| 12634 | A > G | MT-ND5 | p.I100V | MISSENSE       | Homoplasmy   | 147   |  | 0.943 | probably damaging | 1  | soc19                                                             | Thyroid Cancer Cell Line                                                                                                                                                                     |
| 12705 | C > T | MT-ND5 | p.I123I | synonymous SNV | Homoplasmy   | 21208 |  |       |                   | 10 | soc1, soc5, soc7, soc14, soc17, soc18, soc19, soc21, soc23, soc24 | prostate tumor                                                                                                                                                                               |
| 12714 | T > C | MT-ND5 | p.I126I | synonymous SNV | Homoplasmy   | 177   |  |       |                   | 1  | soc11                                                             |                                                                                                                                                                                              |
| 12732 | T > C | MT-ND5 | p.V132V | synonymous SNV | Homoplasmy   | 98    |  |       |                   | 1  | soc12                                                             |                                                                                                                                                                                              |
| 12771 | G > A | MT-ND5 | p.E145E | synonymous SNV | Homoplasmy   | 571   |  |       |                   | 1  | soc5                                                              |                                                                                                                                                                                              |
| 12904 | A > G | MT-ND5 | p.I190V | MISSENSE       | Heteroplasmy | 53    |  | 0.01  | benign            | 1  | soc16 (loss in ovarian cancer tissue)                             |                                                                                                                                                                                              |
| 12981 | C > T | MT-ND5 | p.G215G | synonymous SNV | Homoplasmy   | 4     |  |       |                   | 1  | soc15                                                             |                                                                                                                                                                                              |
| 13263 | A > G | MT-ND5 | p.Q309Q | synonymous SNV | Homoplasmy   | 1866  |  |       |                   | 1  | soc21                                                             |                                                                                                                                                                                              |
| 13590 | G > A | MT-ND5 | p.L418L | synonymous SNV | Homoplasmy   | 2885  |  |       |                   | 1  | soc15                                                             |                                                                                                                                                                                              |
| 13629 | A > G | MT-ND5 | p.L431L | synonymous SNV | Homoplasmy   | 18    |  |       |                   | 1  | soc20                                                             |                                                                                                                                                                                              |
| 13650 | C > T | MT-ND5 | p.P438P | synonymous SNV | Homoplasmy   | 3970  |  |       |                   | 1  | soc14                                                             |                                                                                                                                                                                              |
| 13708 | G > A | MT-ND5 | p.A458T | MISSENSE       | Homoplasmy   | 3666  |  | 0.001 | benign            | 1  | soc16                                                             | acute leukemia platelets, leukocytes & bone marrow, breast tumor; LHON / Increased MS risk / higher freq in PD-ADS, Heteroplasmic in acute leukemia, homoplasmic or absent in earlier stage. |
| 13788 | C > T | MT-ND5 | p.L484L | synonymous SNV | Homoplasmy   | 15    |  |       |                   | 1  | soc17                                                             |                                                                                                                                                                                              |
| 13810 | G > A | MT-ND5 | p.A492T | MISSENSE       | Homoplasmy   | 47    |  | 0.017 | benign            | 1  | soc18                                                             |                                                                                                                                                                                              |
| 13928 | G > C | MT-ND5 | p.S531T | MISSENSE       | Homoplasmy   | 2467  |  | 0.18  | benign            | 2  | soc11, soc16                                                      |                                                                                                                                                                                              |
| 13942 | A > G | MT-ND5 | p.T536A | MISSENSE       | Homoplasmy   | 45    |  | 0.074 | benign            | 1  | soc12                                                             |                                                                                                                                                                                              |

|       |       |        |         |                |            |       |         |       |                   |    |                                                                                                             |                                           |
|-------|-------|--------|---------|----------------|------------|-------|---------|-------|-------------------|----|-------------------------------------------------------------------------------------------------------------|-------------------------------------------|
| 14067 | C > T | MT-ND5 | p.T577T | synonymous SNV | Homoplasmy | 69    |         |       |                   | 1  | soc17                                                                                                       |                                           |
| 14100 | C > T | MT-ND5 | p.F588F | synonymous SNV | Homoplasmy | 14    |         |       |                   | 1  | soc16                                                                                                       |                                           |
| 14133 | A > G | MT-ND5 | p.L599L | synonymous SNV | Homoplasmy | 469   |         |       |                   | 1  | soc15                                                                                                       |                                           |
| 14178 | T > C | MT-ND6 | p.I166V | MISSENSE       | Homoplasmy | 1092  |         | 0.023 | benign            | 1  | soc23                                                                                                       |                                           |
| 14305 | G > A | MT-ND6 | p.S123S | synonymous SNV | Homoplasmy | 353   |         |       |                   | 1  | soc18                                                                                                       |                                           |
| 14318 | T > C | MT-ND6 | p.N119S | MISSENSE       | Homoplasmy | 1790  |         | 0.017 | benign            | 1  | soc21                                                                                                       |                                           |
| 14364 | G > A | MT-ND6 | p.L104L | synonymous SNV | Homoplasmy | 413   |         |       |                   | 1  | soc5                                                                                                        |                                           |
| 14392 | C > T | MT-ND6 | p.V94V  | synonymous SNV | Homoplasmy | 11    |         |       |                   | 1  | soc20                                                                                                       |                                           |
| 14560 | G > A | MT-ND6 | p.V38V  | synonymous SNV | Homoplasmy | 1145  |         |       |                   | 1  | soc16                                                                                                       |                                           |
| 14668 | C > T | MT-ND6 | p.M2M   | synonymous SNV | Homoplasmy | 2065  |         |       |                   | 1  | soc24                                                                                                       | Depressive Disorder associated            |
| 14693 | A > G | MT-TE  |         |                | Homoplasmy | 265   | 11.4662 |       | possibly benign   | 1  | soc23                                                                                                       | MELAS / LHON / DEAF / hypertension helper |
| 14766 | C > T | MT-CYB | p.T7I   | MISSENSE       | Homoplasmy | 39357 |         | 0     | benign            | 16 | soc1, soc5, soc7, soc10, soc11, soc12, soc14, soc15, soc16, soc17, soc18, soc19, soc20, soc21, soc23, soc24 |                                           |
| 14783 | T > C | MT-CYB | p.L13L  | synonymous SNV | Homoplasmy | 10816 |         |       |                   | 6  | soc5, soc7, soc18, soc19, soc21, soc24                                                                      |                                           |
| 14979 | T > C | MT-CYB | p.I78T  | MISSENSE       | Homoplasmy | 171   |         | 0.067 | benign            | 1  | soc24                                                                                                       |                                           |
| 15038 | A > G | MT-CYB | p.I98V  | MISSENSE       | Homoplasmy | 27    |         | 0.807 | possibly damaging | 1  | soc12                                                                                                       |                                           |
| 15043 | G > A | MT-CYB | p.G99G  | synonymous SNV | Homoplasmy | 12019 |         |       |                   | 6  | soc5, soc7, soc18, soc19, soc21, soc24                                                                      | MDD-associated                            |
| 15080 | A > G | MT-CYB | p.T112A | MISSENSE       | Homoplasmy | 70    |         | 0.994 | probably damaging | 1  | soc21                                                                                                       |                                           |
| 15172 | G > A | MT-CYB | p.G142G | synonymous SNV | Homoplasmy | 394   |         |       |                   | 1  | soc24                                                                                                       | endometrial tumor                         |
| 15191 | T > C | MT-CYB | p.L149L | synonymous SNV | Homoplasmy | 75    |         |       |                   | 1  | soc5                                                                                                        |                                           |

|       |       |             |         |                |            |       |        |       |               |    |                                                                                                             |                                        |
|-------|-------|-------------|---------|----------------|------------|-------|--------|-------|---------------|----|-------------------------------------------------------------------------------------------------------------|----------------------------------------|
| 15301 | G > A | MT-CYB      | p.L185L | synonymous SNV | Homoplasmy | 14598 |        |       |               | 6  | soc5, soc7, soc18, soc19, soc21, soc24                                                                      | tumor                                  |
| 15326 | A > G | MT-CYB      | p.T194A | MISSENSE       | Homoplasmy | 50503 |        | 0.009 | benign        | 16 | soc1, soc5, soc7, soc10, soc11, soc12, soc14, soc15, soc16, soc17, soc18, soc19, soc20, soc21, soc23, soc24 |                                        |
| 15346 | G > A | MT-CYB      | p.L200L | synonymous SNV | Homoplasmy | 406   |        |       |               | 2  | soc10, soc20                                                                                                |                                        |
| 15412 | T > C | MT-CYB      | p.P222P | synonymous SNV | Homoplasmy | 83    |        |       |               | 1  | soc24                                                                                                       |                                        |
| 15479 | T > C | MT-CYB      | p.F245L | MISSENSE       | Homoplasmy | 193   |        | 0.012 | benign        | 1  | soc19                                                                                                       |                                        |
| 15487 | A > T | MT-CYB      | p.P247P | synonymous SNV | Homoplasmy | 2084  |        |       |               | 2  | soc18, soc21                                                                                                |                                        |
| 15535 | C > T | MT-CYB      | p.N263N | synonymous SNV | Homoplasmy | 1179  |        |       |               | 2  | soc12, soc15                                                                                                |                                        |
| 15724 | A > G | MT-CYB      | p.W326W | synonymous SNV | Homoplasmy | 132   |        |       |               | 1  | soc7                                                                                                        |                                        |
| 15784 | T > C | MT-CYB      | p.P346P | synonymous SNV | Homoplasmy | 1770  |        |       |               | 1  | soc18                                                                                                       | POAG - potential for association       |
| 15930 | G > A | MT-TT       |         |                | Homoplasmy | 1246  | 2.3888 |       | likely benign | 1  | soc12                                                                                                       |                                        |
| 15941 | T > C | MT-TT       |         |                | Homoplasmy | 877   | 2.8613 |       | likely benign | 1  | soc20                                                                                                       |                                        |
| 16086 | T > C | MT-HV1/TAS2 |         |                | Homoplasmy | 2752  |        |       |               | 2  | soc15, soc17                                                                                                |                                        |
| 16092 | T > C | MT-HV1/TAS2 |         |                | Homoplasmy | 2234  |        |       |               | 2  | soc7, soc12                                                                                                 |                                        |
| 16111 | C > T | MT-HV1/TAS2 |         |                | Homoplasmy | 3978  |        |       |               | 1  | soc1                                                                                                        | colonic crypts, prostate tumor         |
| 16126 | T > C | MT-HV1/TAS2 |         |                | Homoplasmy | 12581 |        |       |               | 1  | soc23                                                                                                       | glioblastoma, normal tissues           |
| 16129 | G > A | MT-HV1/TAS2 |         |                | Homoplasmy | 18313 |        |       |               | 2  | soc1, soc24                                                                                                 | Cyclic Vomiting Syndrome with Migraine |
| 16136 | T > C | MT-HV1/TAS2 |         |                | Homoplasmy | 1320  |        |       |               | 1  | soc15                                                                                                       |                                        |
| 16145 | G > A | MT-HV1      |         |                | Homoplasmy | 3866  |        |       |               | 1  | soc11                                                                                                       |                                        |
| 16164 | A > G | MT-HV1/TAS  |         |                | Homoplasmy | 621   |        |       |               | 1  | soc19                                                                                                       |                                        |

|       |       |             |  |  |              |       |  |  |  |   |                                                            |                                                                                                                                                   |
|-------|-------|-------------|--|--|--------------|-------|--|--|--|---|------------------------------------------------------------|---------------------------------------------------------------------------------------------------------------------------------------------------|
| 16171 | A > T | MT-HV1/TAS  |  |  | Homoplasmy   | 21    |  |  |  | 1 | soc19                                                      |                                                                                                                                                   |
| 16172 | T > C | MT-HV1/TAS  |  |  | Homoplasmy   | 10296 |  |  |  | 1 | soc19                                                      | MNGIE tissues, head/neck tumor back-mutation                                                                                                      |
| 16182 | A > C | MT-HV1      |  |  | Heteroplasmy | 8492  |  |  |  | 4 | soc10, soc15, soc19, soc20                                 | prostate tumor                                                                                                                                    |
| 16183 | A > C | MT-HV1      |  |  | Heteroplasmy | 18155 |  |  |  | 5 | soc10, soc12, soc15, soc19, soc20                          | lung tumor back-mutation, prostate tumor, Melanoma patients                                                                                       |
| 16185 | C > T | MT-HV1      |  |  | Homoplasmy   | 1574  |  |  |  | 1 | soc18                                                      |                                                                                                                                                   |
| 16189 | T > C | MT-HV1      |  |  | Homoplasmy   | 32494 |  |  |  | 5 | soc10, soc12, soc15, soc19, soc20                          | prostate tumor, normal buccal swab, Diabetes / Cardiomyopathy / Endometrial cancer risk / mtDNA copy nbr / Metabolic Syndrome / Melanoma patients |
| 16192 | C > T | MT-HV1      |  |  | Homoplasmy   | 5359  |  |  |  | 1 | soc11                                                      | Melanoma patients                                                                                                                                 |
| 16203 | A > G | MT-HV1/MT-5 |  |  | Homoplasmy   | 294   |  |  |  | 1 | soc16                                                      |                                                                                                                                                   |
| 16209 | T > C | MT-HV1      |  |  | Homoplasmy   | 3136  |  |  |  | 1 | soc5                                                       |                                                                                                                                                   |
| 16217 | T > C | MT-HV1      |  |  | Homoplasmy   | 8548  |  |  |  | 4 | soc10, soc12, soc15, soc20                                 | prostate tumor                                                                                                                                    |
| 16223 | C > T | MT-HV1      |  |  | Homoplasmy   | 57418 |  |  |  | 9 | soc1, soc5, soc7, soc14, soc17, soc18, soc19, soc21, soc24 | tumor                                                                                                                                             |
| 16231 | T > C | MT-HV1      |  |  | Homoplasmy   | 1040  |  |  |  | 1 | soc23                                                      |                                                                                                                                                   |
| 16243 | T > C | MT-HV1      |  |  | Homoplasmy   | 2585  |  |  |  | 1 | soc11                                                      |                                                                                                                                                   |
| 16249 | T > C | MT-HV1      |  |  | Homoplasmy   | 2899  |  |  |  | 1 | soc24                                                      | prostate tumor                                                                                                                                    |
| 16257 | C > A | MT-HV1      |  |  | Homoplasmy   | 976   |  |  |  | 1 | soc1                                                       |                                                                                                                                                   |
| 16260 | C > T | MT-HV1      |  |  | Homoplasmy   | 2056  |  |  |  | 1 | soc18                                                      | gastric carcinoma                                                                                                                                 |
| 16261 | C > T | MT-HV1      |  |  | Homoplasmy   | 8342  |  |  |  | 1 | soc1                                                       |                                                                                                                                                   |
| 16265 | A > G | MT-HV1      |  |  | Homoplasmy   | 933   |  |  |  | 1 | soc17                                                      |                                                                                                                                                   |
| 16266 | C > T | MT-HV1      |  |  | Homoplasmy   | 2439  |  |  |  | 2 | soc19, soc23                                               |                                                                                                                                                   |
| 16274 | G > A | MT-HV1      |  |  | Homoplasmy   | 3769  |  |  |  | 1 | soc7                                                       | prostate tumor                                                                                                                                    |
| 16278 | C > T | MT-HV1      |  |  | Homoplasmy   | 12296 |  |  |  | 1 | soc18                                                      | ovarian control tissue                                                                                                                            |

|       |       |          |  |  |            |       |  |  |  |   |                                                       |                                                                                                           |
|-------|-------|----------|--|--|------------|-------|--|--|--|---|-------------------------------------------------------|-----------------------------------------------------------------------------------------------------------|
| 16288 | T > C | MT-HV1   |  |  | Homoplasmy | 1062  |  |  |  | 1 | soc21                                                 |                                                                                                           |
| 16290 | C > T | MT-HV1   |  |  | Homoplasmy | 6575  |  |  |  | 2 | soc14, soc17                                          | breast tumor                                                                                              |
| 16298 | T > C | MT-HV1   |  |  | Homoplasmy | 8340  |  |  |  | 1 | soc21                                                 | prostate tumor                                                                                            |
| 16304 | T > C | MT-HV1   |  |  | Homoplasmy | 11502 |  |  |  | 2 | soc11, soc16                                          | esophageal, breast & prostate tumors                                                                      |
| 16311 | T > C | MT-HV1   |  |  | Homoplasmy | 23464 |  |  |  | 1 | soc14                                                 |                                                                                                           |
| 16319 | G > A | MT-HV1   |  |  | Homoplasmy | 8966  |  |  |  | 3 | soc14, soc17, soc23                                   |                                                                                                           |
| 16324 | T > C | MT-HV1   |  |  | Homoplasmy | 1010  |  |  |  | 1 | soc5                                                  | esophageal cancer                                                                                         |
| 16327 | C > T | MT-HV1   |  |  | Homoplasmy | 5230  |  |  |  | 1 | soc21                                                 |                                                                                                           |
| 16357 | T > C | MT-HV1   |  |  | Homoplasmy | 1596  |  |  |  | 1 | soc10                                                 | hair                                                                                                      |
| 16362 | T > C | MT-HV1   |  |  | Homoplasmy | 28316 |  |  |  | 6 | soc5, soc7, soc14, soc17, soc19, soc24                |                                                                                                           |
| 16390 | G > A | upstream |  |  | Homoplasmy | 7464  |  |  |  | 2 | soc11, soc21                                          | breast, ovarian tumor, POAG - potential for association                                                   |
| 16399 | A > G | upstream |  |  | Homoplasmy | 3097  |  |  |  | 1 | soc23                                                 | gastric carcinoma                                                                                         |
| 16519 | T > C | upstream |  |  | Homoplasmy | 62812 |  |  |  | 8 | soc7, soc11, soc12, soc14, soc15, soc16, soc21, soc23 | glioblastoma, gastric, lung, ovarian, prostate tumors, Cyclic Vomiting Syndrome with Migraine /metastasis |

Note: the reference sequence is rCRS.

The GB fre. (GenBank frequency) data is obtained from MITOMAP database and is derived from 51192 GenBank sequences with size greater than 15.4kbp and 74326 Control Region sequences with size 0.4-1.6kbp (Updated (27 Jul 2020)).

**Table S2.** The 27 somatic mtDNA mutations in the study patients.

| Case # | Position | Base change | Heteroplasmy | Locus              | Amino acid change | Functional class     | Regions               | GB Freq. | MitoTIP | Polyphen2 | Score Interpretation | Observed in cell or tissue type (MITOMAP)                   |
|--------|----------|-------------|--------------|--------------------|-------------------|----------------------|-----------------------|----------|---------|-----------|----------------------|-------------------------------------------------------------|
| SOC1   | 439      | A > C       | 0.28         | MT-OHR/LSP/TFL/HV3 |                   |                      | d-loop                | 10       |         |           |                      |                                                             |
| SOC12  | 439      | A > C       | 0.23         | MT-OHR/LSP/TFL/HV4 |                   |                      | d-loop                | 10       |         |           |                      |                                                             |
| SOC15  | 439      | A > C       | 0.26         | MT-OHR/LSP/TFL/HV5 |                   |                      | d-loop                | 10       |         |           |                      |                                                             |
| SOC16  | 439      | A > C       | 0.25         | MT-OHR/LSP/TFL/HV  |                   |                      | d-loop                | 10       |         |           |                      |                                                             |
| SOC23  | 439      | A > C       | 0.23         | MT-OHR/LSP/TFL/HV7 |                   |                      | d-loop                | 10       |         |           |                      |                                                             |
| SOC7   | 1045     | G > A       | 0.56         | MT-RNR1            |                   |                      | rRNA                  | Novel    |         |           |                      |                                                             |
| SOC1   | 1273     | G > A       | 0.08         | MT-RNR1            |                   |                      | rRNA                  | Novel    |         |           |                      |                                                             |
| SOC5   | 1360     | G > A       | 0.65         | MT-RNR1            |                   |                      | rRNA                  | Novel    |         |           |                      |                                                             |
| SOC20  | 1592     | T > C       | 0.80         | MT-RNR1            |                   |                      | rRNA                  | Novel    |         |           |                      |                                                             |
| SOC11  | 2876     | G > A       | 0.16         | MT-RNR2            |                   |                      | rRNA                  | Novel    |         |           |                      |                                                             |
| SOC5   | 3173     | G > A       | 0.11         | MT-RNR2            |                   |                      | rRNA                  | 13       |         |           |                      |                                                             |
| SOC5   | 3566     | 3566insC    | 0.34         | MT-ND1             | p.T87fs           | frameshift insertion | protein coding region | Novel    |         |           | damaging             | colorectal tumor, oncocytoma                                |
| SOC1   | 4175     | G > A       | 0.42         | MT-ND1             | p.W290X           | stop-gain SNV        | protein coding region | Novel    |         |           | damaging             |                                                             |
| SOC12  | 4813     | T > C       | 0.08         | MT-ND2             | p.V115A           | missense             | protein coding region | 2        |         | 0.535     | possibly damaging    |                                                             |
| SOC7   | 5269     | T > C       | 0.58         | MT-ND2             | p.I267T           | missense             | protein coding region | Novel    |         | 0.808     | possibly damaging    |                                                             |
| SOC10  | 5540     | G > A       | 0.16         | MT-TW              |                   |                      | tRNA                  | Novel    | 16.1127 |           | possibly pathogenic  | encephalomyopathy / DEAF                                    |
| SOC23  | 6382     | G > A       | 0.73         | MT-CO1             | p.G160E           | missense             | protein coding region | Novel    |         | 0.925     | probably damaging    |                                                             |
| SOC21  | 6579     | G > A       | 0.27         | MT-CO1             | p.G226X           | stop-gain SNV        | protein coding region | Novel    |         |           | damaging             |                                                             |
| SOC15  | 8383     | T > C       | 0.23         | MT-ATP8            | p.T6T             | synonymous SNV       | protein coding region | 155      |         |           |                      |                                                             |
| SOC16  | 9478     | 9478delT    | 0.41         | MT-CO3             | p.V91fs           | frameshift deletion  | protein coding region | Novel    |         |           | damaging             | MSI                                                         |
| SOC18  | 11152    | T > C       | 0.42         | MT-ND4             | p.A131A           | synonymous SNV       | protein coding region | 120      |         |           |                      | pancreatic cancer cell line                                 |
| SOC17  | 11902    | G > A       | 0.09         | MT-ND4             | p.V381V           | synonymous SNV       | protein coding region | 39       |         |           |                      |                                                             |
| SOC17  | 12814    | G > A       | 0.82         | MT-ND5             | p.A160T           | missense             | protein coding region | 1        |         | 0.998     | probably damaging    |                                                             |
| SOC14  | 13201    | G > A       | 0.2          | MT-ND5             | p.A289T           | missense             | protein coding region | Novel    |         | 0.999     | probably damaging    |                                                             |
| SOC24  | 14968    | T > C       | 0.15         | MT-CYB             | p.N74N            | synonymous SNV       | protein coding region | 30       |         |           |                      |                                                             |
| SOC14  | 14979    | T > C       | 0.21         | MT-CYB             | p.I78T            | missense             | protein coding region | 171      |         | 0.067     | benign               |                                                             |
| SOC12  | 16182    | A > C       | 0.13         | MT-HV1             |                   |                      | d-loop                | 8492     |         |           |                      |                                                             |
| SOC7   | 16183    | A > C       | 0.11         | MT-HV1             |                   |                      | d-loop                | 18155    |         |           |                      | lung tumor back-mutation, prostate tumor, melanoma patients |

Note: The GB fre. (GenBank frequency) data is obtained from MITOMAP database and is derived from 51192 GenBank sequences with size greater than 15.4kbp and 74326 Control Region sequences with size 0.4-1.6kbp (Updated 27 Jul 2020).

Disease-associated information of the detected mtDNA variants were retrieved from MITOMAP (Updated 27 Jul 2020).

**Table S3.** Summary statement of DNA base change characteristics in all sequence variants of this study.

|               | Germline variants, 569 variants<br>Number (%) |            |          |         |            |                                            |                           | Somatic mutations, 28 mutations<br>Number (%) |          |          |         |                                            |                           |
|---------------|-----------------------------------------------|------------|----------|---------|------------|--------------------------------------------|---------------------------|-----------------------------------------------|----------|----------|---------|--------------------------------------------|---------------------------|
|               | Total                                         | d-loop     | rRNA     | tRNA    | intergenic | protein coding region non-syn <sup>‡</sup> | protein coding region syn | Total                                         | d-loop   | rRNA     | tRNA    | protein coding region non-syn <sup>‡</sup> | protein coding region syn |
| Transversions |                                               |            |          |         |            |                                            |                           |                                               |          |          |         |                                            |                           |
| A:T→C:G       | 12 (2.1)                                      | 11 (1.9)   | -        | -       | -          | 1 (0.2)                                    | -                         | 7 (25.0)                                      | 7 (25.0) | -        | -       | -                                          | -                         |
| A:T→T:A       | 7 (1.2)                                       | 2 (0.4)    | -        | -       | -          | 1 (0.2)                                    | 4 (0.7)                   | -                                             | -        | -        | -       | -                                          | -                         |
| G:C→T:A       | 7 (1.2)                                       | 1 (0.2)    | -        | -       | -          | 3 (0.5)                                    | 3 (0.5)                   | -                                             | -        | -        | -       | -                                          | -                         |
| G:C→C:G       | 3 (0.5)                                       | -          | -        | -       | -          | 2 (0.4)                                    | 1 (0.2)                   | -                                             | -        | -        | -       | -                                          | -                         |
| Transitions   |                                               |            |          |         |            |                                            |                           |                                               |          |          |         |                                            |                           |
| A:T→G:C       | 311 (54.7)                                    | 100 (17.6) | 50 (8.8) | 6 (1.1) | -          | 70 (12.3)                                  | 85 (14.9)                 | 7 (25.0)                                      | -        | 1 (3.6)  | -       | 3 (10.7)                                   | 3 (10.7)                  |
| G:C→A:T       | 186 (32.7)                                    | 41 (7.2)   | 9 (1.6)  | 3 (0.5) | -          | 31 (5.4)                                   | 102 (17.9)                | 12 (42.9)                                     | -        | 5 (17.9) | 1 (3.6) | 5 (17.9)                                   | 1 (3.6)                   |
| Small indels  | 43 (7.6)                                      | 24 (4.2)   | 16 (2.8) | -       | 3 (0.5)    | -                                          | -                         | 2 (7.1)                                       | -        | -        | -       | 2 (7.1)                                    | -                         |

Note: non-syn<sup>‡</sup> includes nonsynonymous variants, and missense and truncating mutations; -, not observed
